# Supplementary material for: A highly mismatched NiO2-to-Pd hetero-structure as an efficient nanocatalyst for the hydrogen evolution reaction
Source: Royal Society of Chemistry journal article supplement (doi:10.1039/d0se00185f), 2020-01-01
Supplement: d0se00185f1.pdf [file d0se00185f1.pdf]

## Highly Mismatched NiO<sub>2</sub>-to-Pd Hetero-Structure as an Efficient Nanocatalyst for Hydrogen Evolution Reaction

Authors: Dinesh Bhalothia,<sup>a</sup> Lin Shuan,<sup>b</sup> Yi-Jia Wu<sup>a</sup>, Che Yan<sup>a</sup>, Kuan-Wen Wang,<sup>b\*</sup> and  
Tsan-Yao Chen<sup>a, c, d, e\*</sup>

Affiliations:

<sup>a</sup> Department of Engineering and System Science, National Tsing Hua University, Hsinchu 30013, Taiwan

<sup>b</sup> Institute of Materials Science and Engineering, National Central University, Taoyuan 32001, Taiwan

<sup>c</sup> Institute of Nuclear Engineering and Science, National Tsing Hua University, Hsinchu 30013, Taiwan

<sup>d</sup> Hierarchical Green-Energy Materials (Hi-GEM) Research Centre, National Cheng Kung University, Tainan 70101, Taiwan

<sup>e</sup> Higher Education Sprout Project, Competitive Research Team, National Tsing Hua University, Hsinchu 30013, Taiwan

\*Corresponding Author:

Tsan-Yao Chen

Email: [chencaeser@gmail.com](mailto:chencaeser@gmail.com)

Tel: +886-3-5715131 # 34271

FAX: +885-3-5720724

## 1. Quantitative XRD parameters of NiPd-CNT and Pd-CNT NCs.

**Table S1.** Quantitative XRD parameters of NiPd-CNT and Pd-CNT NCs.

| NC       | $d_{(111)}$ (Å) | $d_{(200)}$ (Å) | $d_{(220)}$ (Å) | $d_{\text{NiPd3 (20-2-2)}}$ (Å) | $D_{(111)}$ (Å) | $D_{(200)}$ (Å) | $D_{(220)}$ (Å) | $D_{\text{NiPd3 (20-2-2)}}$ (Å) |
|----------|-----------------|-----------------|-----------------|---------------------------------|-----------------|-----------------|-----------------|---------------------------------|
| NiPd-CNT | 2.276           | 1.991           | 1.395           | 1.528                           | 75.6            | 52.3            | 31.7            | 27.5                            |
| Pd-CNT   | 2.278           | 1.984           | 1.392           | N/A                             | 86.6            | 64.4            | 61.1            | N/A                             |

## 2. XPS analysis of Ni-CNT and NiPd-CNT nanocatalyst at Ni-2p orbitals.

To further examine the structural changes in Ni-crystal, X-ray photoelectron spectroscopy (XPS) has been applied at Ni-2p orbitals of experimental NCs. **Figure S1** depicts the fitted XPS spectra in the Ni-2p region of the Ni-CNT and NiPd-CNT NCs. In a Ni-2p spectrum, apparently, two peaks around at 855.7 and 873.5 eV are corresponding to the binding energies of Ni<sup>2+</sup>- 2p<sub>3/2</sub> and Ni<sup>2+</sup>- 2p<sub>1/2</sub>, respectively. Simultaneously, two satellite peaks nearly at 861 eV and 880 eV could be attributed to the oxidation products on the surface<sup>1</sup>. Meanwhile, a weak shake up peak centered nearly at 852.7 eV is corresponding to metallic state of Ni, which reveals that most of the Ni is present in form of NiO<sub>2</sub>. The binding energies of Ni (0), Ni<sup>2+</sup>- 2p<sub>3/2</sub> and Ni<sup>2+</sup>- 2p<sub>1/2</sub> peaks for experimental NCs are summarized in **Table S2**. Accordingly, although the difference in binding energies of the Ni (0), Ni<sup>2+</sup>- 2p<sub>3/2</sub> and Ni<sup>2+</sup>- 2p<sub>1/2</sub> orbitals for Ni-CNT and NiPd-CNT NCs are not obvious. However, peaks are slightly shifted to lower energy values for NiPd-CNT NC as compared to that of Ni-CNT NC. This is acceptable because of increased index of electron relocation from Ni to Pd atoms in NiPd-CNT NC. Such a scenario is further confirmed by intensity difference of various peaks in both NCs. Intensity of emission peaks in a XPS spectrum is positively related to electron density of the target atoms. Therefore, the comparatively higher intensity in the XPS spectra of Ni-CNT reflects its most abundant Ni-2p electrons. Whereas, relatively decreased intensity observed in case of NiPd-CNT NC, which itself is a result of high index of electron relocation from Ni to Pd-atoms. Such characteristics are consistent with Pd-3d orbital XPS findings.

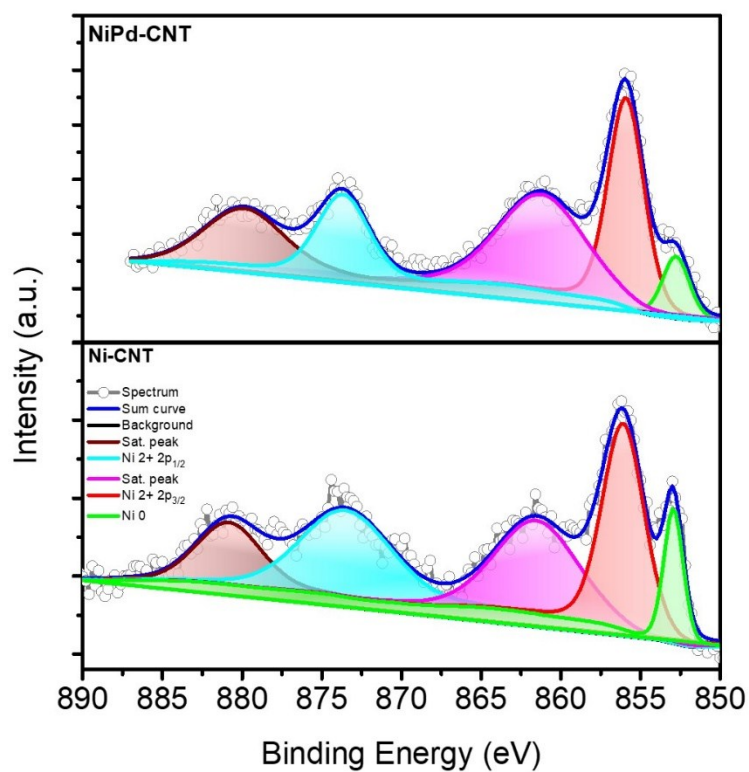

**Figure S1.** XPS spectra of Ni-CNT and NiPd-CNT nanocatalyst at Ni-2p orbitals.

**Table S2.** XPS determined binding energy of experimental NC at Ni-2p orbital

| Samples  | Binding Energies |                                    |                                    |
|----------|------------------|------------------------------------|------------------------------------|
|          | Ni (0)           | Ni <sup>2+</sup> 2p <sub>3/2</sub> | Ni <sup>2+</sup> 2p <sub>1/2</sub> |
| NiPd-CNT | 852.778          | 855.902                            | 873.643                            |
| Ni-CNT   | 852.985          | 856.011                            | 873.745                            |

**3. Cyclic voltammogram (CV) of NiPd-CNT NC compared with control samples (Ni-CNT and Pd-CNT) and commercial J.M.-Pt/C NC.**

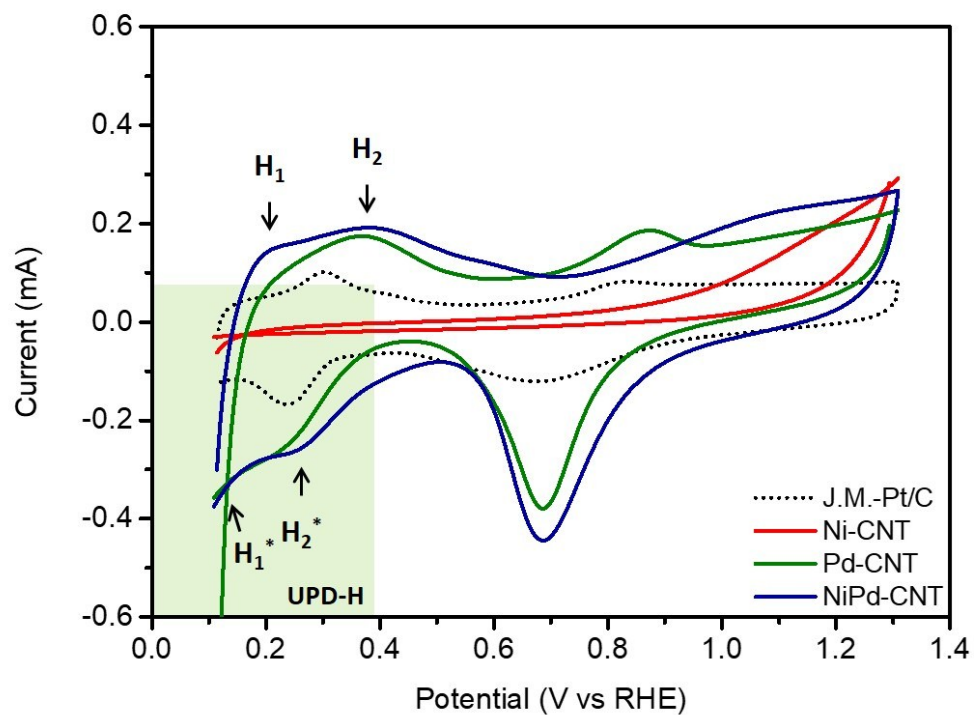

**Figure S2.** Cyclic voltammogram (CV) of NiPd-CNT NC compared with control samples (Ni-CNT and Pd-CNT) and commercial J.M.-Pt/C NC.

#### 4. ICP-AES determined composition ratios of experimental nanocatalysts

**Table S3.** ICP-AES determined composition ratios of experimental nanocatalysts

| Samples  | Ni (wt.%) | Pd (wt.%) |
|----------|-----------|-----------|
| NiPd-CNT | 9.287     | 16.95     |

#### References

1. D. Bin, B. Yang, F. Ren, K. Zhang, P. Yang and Y. Du, *Journal of Materials Chemistry A*, 2015, **3**, 14001-14006.
